# Supplementary material for: Distinct Levels of Reactive Oxygen Species Coordinate Metabolic Activity with Beta-cell Mass Plasticity
Source: Sci Rep. 2017 Jun 26;7:3994. doi: 10.1038/s41598-017-03873-9 (PMC5484671; doi:10.1038/s41598-017-03873-9)
Supplement: Supplementary file 1 — Supplementary information [file 41598_2017_3873_MOESM1_ESM.pdf]

## **Supplementary information**

### **Distinct Levels of Reactive Oxygen Species Coordinate Metabolic Activity with Beta-cell Mass Plasticity**

Ezzaldin Ahmed Alfar<sup>1,2,3</sup>\*, Dilyana Kirova<sup>4</sup>\*, Judith Konantz<sup>1,2</sup>, Sarah Birke<sup>1,2</sup>, Jörg Mansfeld<sup>4\*\*</sup> and Nikolay Ninov<sup>1,2,3\*\*</sup>

\* These authors contributed equally

\*\* Correspondence to [joerg.mansfeld@biotec.tu-dresden.de](mailto:joerg.mansfeld@biotec.tu-dresden.de) and [nikolay.ninov@crt-dresden.de](mailto:nikolay.ninov@crt-dresden.de)

## Supplementary Figures

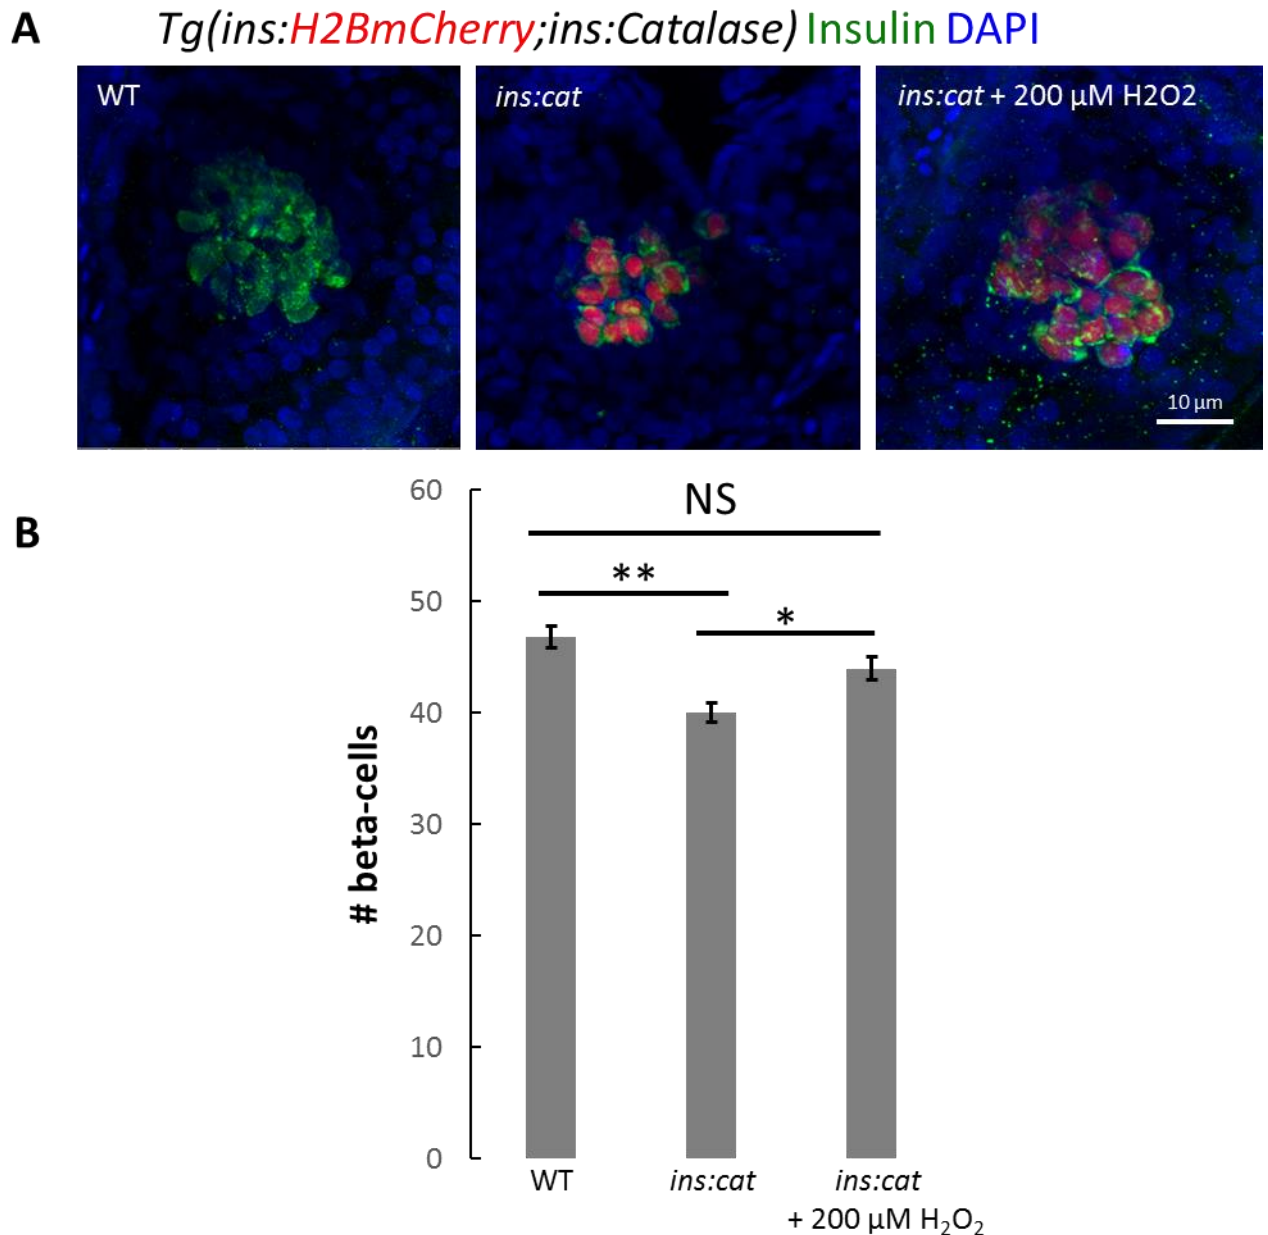

**Figure S1:  $H_2O_2$ -treatment restores beta-cell number in *Tg(ins:catalase;ins:H2BmCherry)* larvae.**

**(A)** Confocal projections of the principal islets of 4 dpf WT and *Tg(ins:catalase;ins:H2BmCherry)* larvae treated with vehicle or 200  $\mu$ M  $H_2O_2$  from 2 to 4 dpf. **(B)** Quantification of the average number of beta-cells in WT (n=32), *Tg(ins:catalase;ins:H2BmCherry)* (n=40), and *Tg(ins:catalase;ins:H2BmCherry)* larvae treated with 200  $\mu$ M  $H_2O_2$  (n=40). The average number of beta-cells in *Tg(ins:catalase;ins:H2BmCherry)* animals was significantly reduced compared to WT (p=2.8E-06), whereas in the  $H_2O_2$ -treated *Tg(ins:catalase;ins:H2BmCherry)* larvae, this number was not different, indicating that exogenous  $H_2O_2$ -administration can restore beta-cell mass. Error bars = SEM. NS = Not significant.

*Tg(ins:H2BmCherry; ins:catalase)* Insulin Glucagon

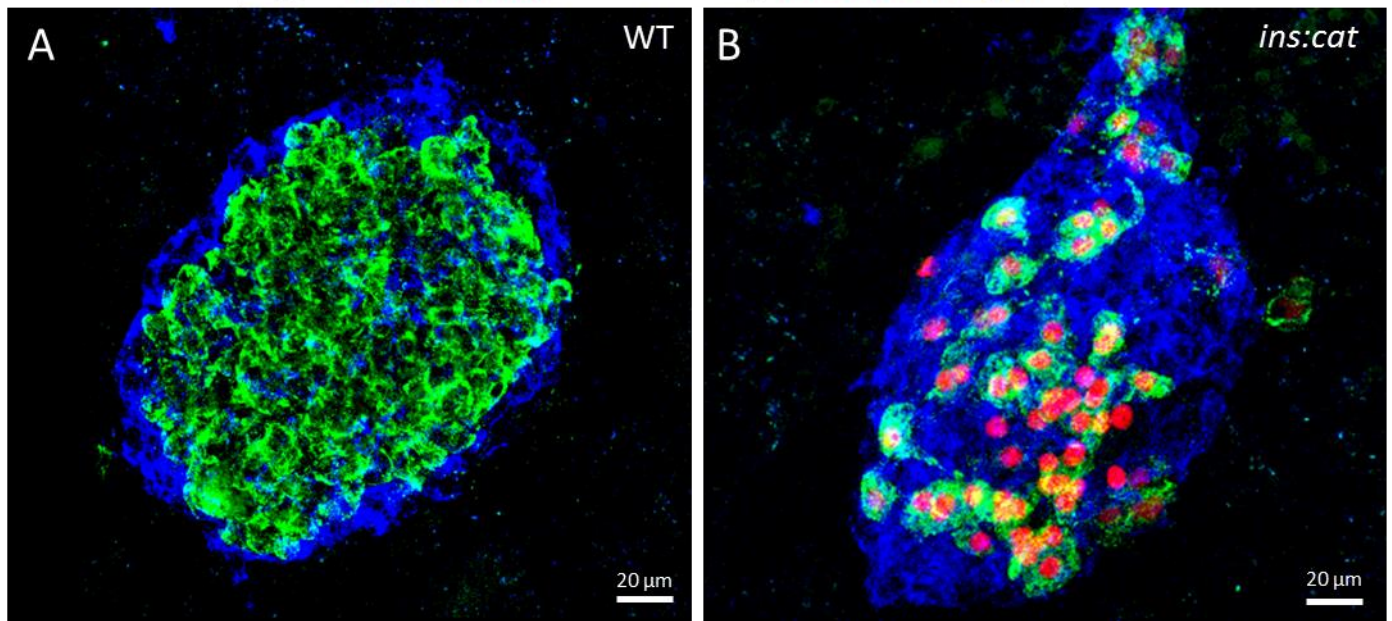

**Figure S2: Catalase expression in beta-cells leads to a reduction in beta-cell mass.**

**(A-B)** Confocal projections spanning the volume of the principal islets of WT and *Tg(ins:catalase;ins:H2BmCherry)* animals stained for insulin and glucagon. The beta-cells in the principal islet of the *Tg(ins:catalase;ins:H2BmCherry)* animals (B) were scattered and fewer in numbers as compared to WT (A).

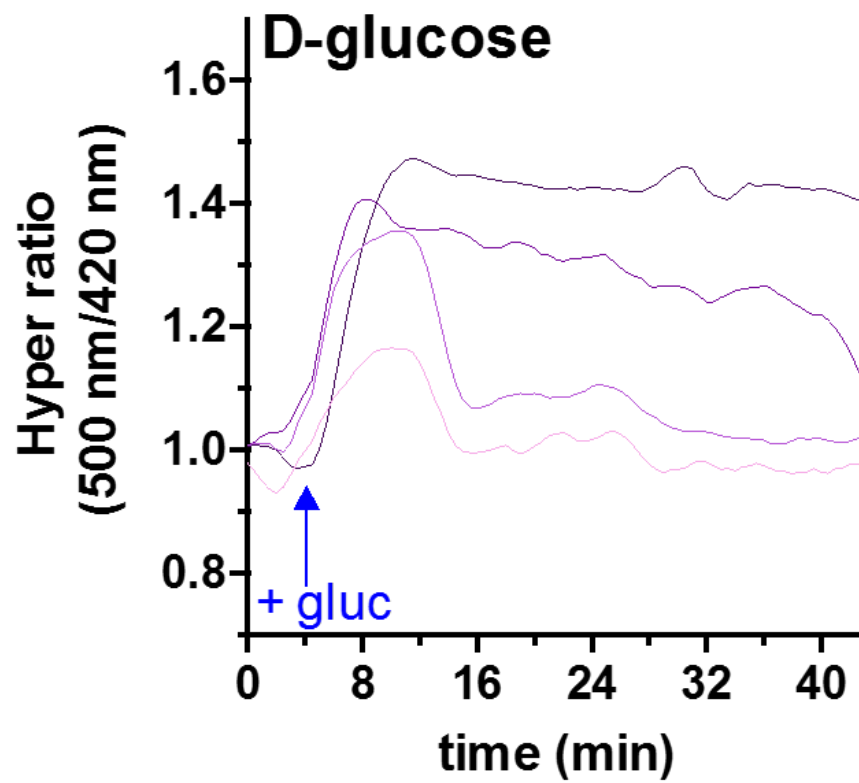

**Figure S3: Heterogeneity of  $\text{H}_2\text{O}_2$  levels in response to glucose.**

Quantification of HyPer-3 ratio in INS-1 cells showing distinct dynamics of  $\text{H}_2\text{O}_2$  levels in response to 18 mM D-glucose. Note, selected representative long-term single cell tracks from experiments from Fig.3b are shown to illustrate transient and more persistent increases in  $\text{H}_2\text{O}_2$  levels in response to the same glucose stimulus.

*Tg(ins:CFP-NTR)* DAPI TUNEL

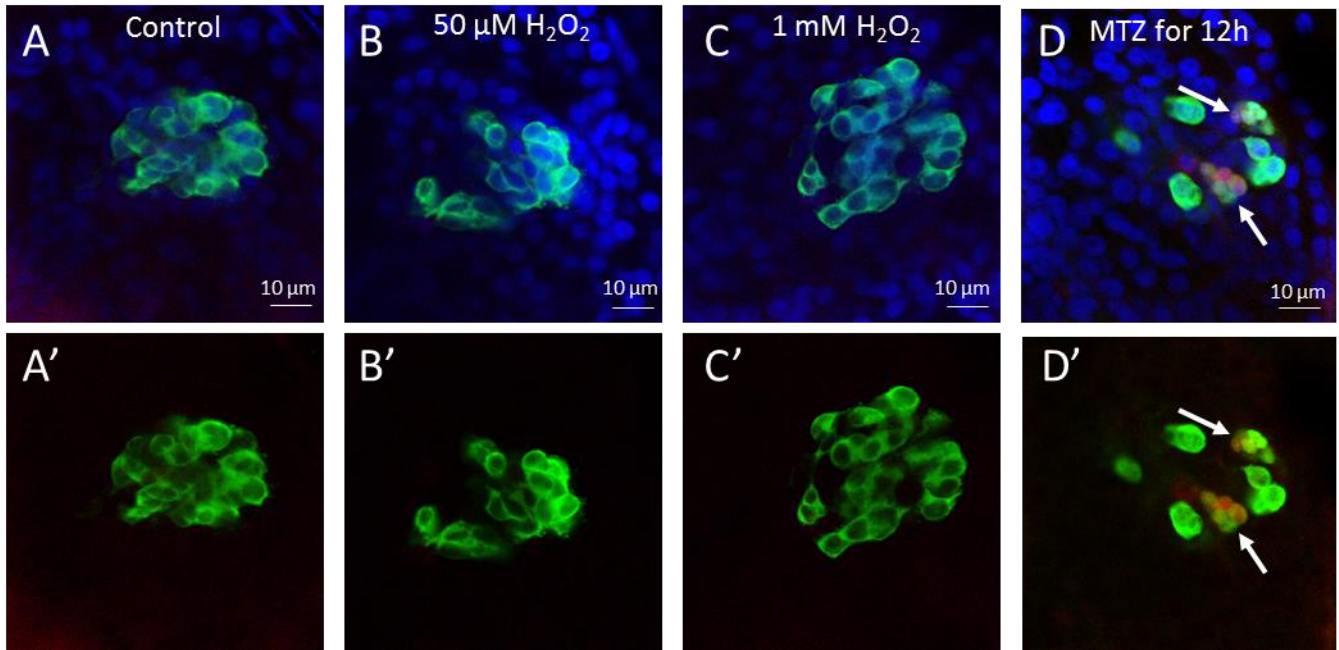

**Figure S4: Treatment with different concentrations of H<sub>2</sub>O<sub>2</sub> does not cause beta-cell apoptosis.** (A-C) Confocal sections of *Tg(ins:CFP-NTR)* larvae. Beta-cells are marker using CFP (green). The larvae were treated with vehicle (A), 50  $\mu$ M H<sub>2</sub>O<sub>2</sub> (B), or 1mM H<sub>2</sub>O<sub>2</sub> (C) from 3 to 4 dpf and beta-cell apoptosis was analyzed using the TUNEL assay. No TUNEL-positivity can be observed in the beta-cells or in the surrounding pancreatic tissue. (D) *Tg(ins:CFP-NTR)* expresses the Nitroreductase (NTR) enzyme from *Escherichia coli* under the *insulin* promoter. The NTR enzyme converts the pro-drug metronidazole (MTZ) to its cytotoxic form, leading to the specific ablation of beta-cells upon exposure to MTZ. TUNEL<sup>+</sup> beta-cells were evident after 12h of treatment with MTZ to induce targeted beta-cell ablation.

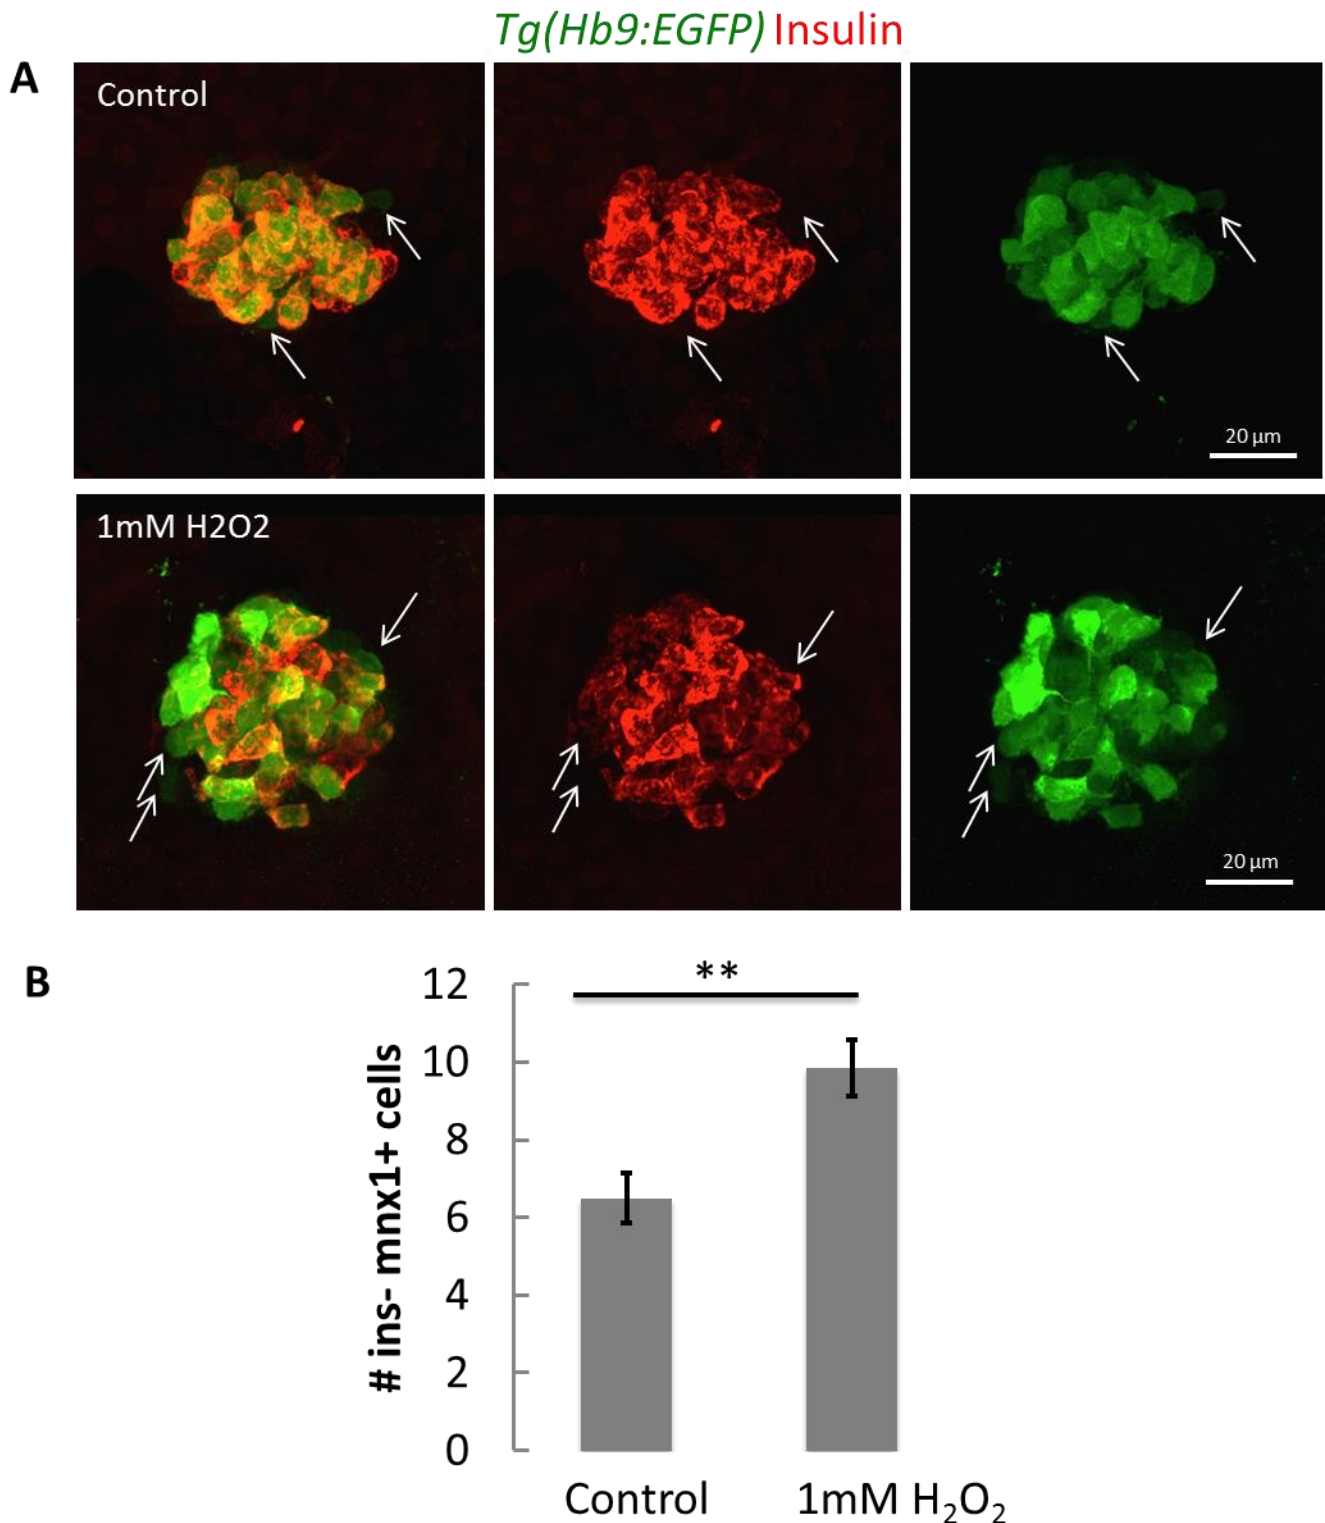

**Figure S5: H<sub>2</sub>O<sub>2</sub>-treatment increases the number of *mnx1*<sup>+</sup>/*insulin*<sup>-</sup> cells.**

**(A)** Confocal projections of the principal islets of 4 dpf *Tg(mnx1:GFP)* controls and larvae treated with 1mM H<sub>2</sub>O<sub>2</sub> from 3 to 4 dpf. Arrowheads point to *mnx1:GFP*<sup>+</sup> but *Insulin*<sup>-</sup> cells. **(B)** Quantification of the number of *mnx1:GFP*<sup>+</sup> and *insulin*<sup>-</sup> cells in controls (n=16 animals) and H<sub>2</sub>O<sub>2</sub>-treated animals (n=13 animals). H<sub>2</sub>O<sub>2</sub>-treated animals exhibit higher numbers of *mnx1:GFP*<sup>+</sup> and *Insulin*<sup>-</sup> cells compared to controls (p= 0,002). Error bars = SEM.

*Tg(Tp1:H2BmCherry)* Insulin

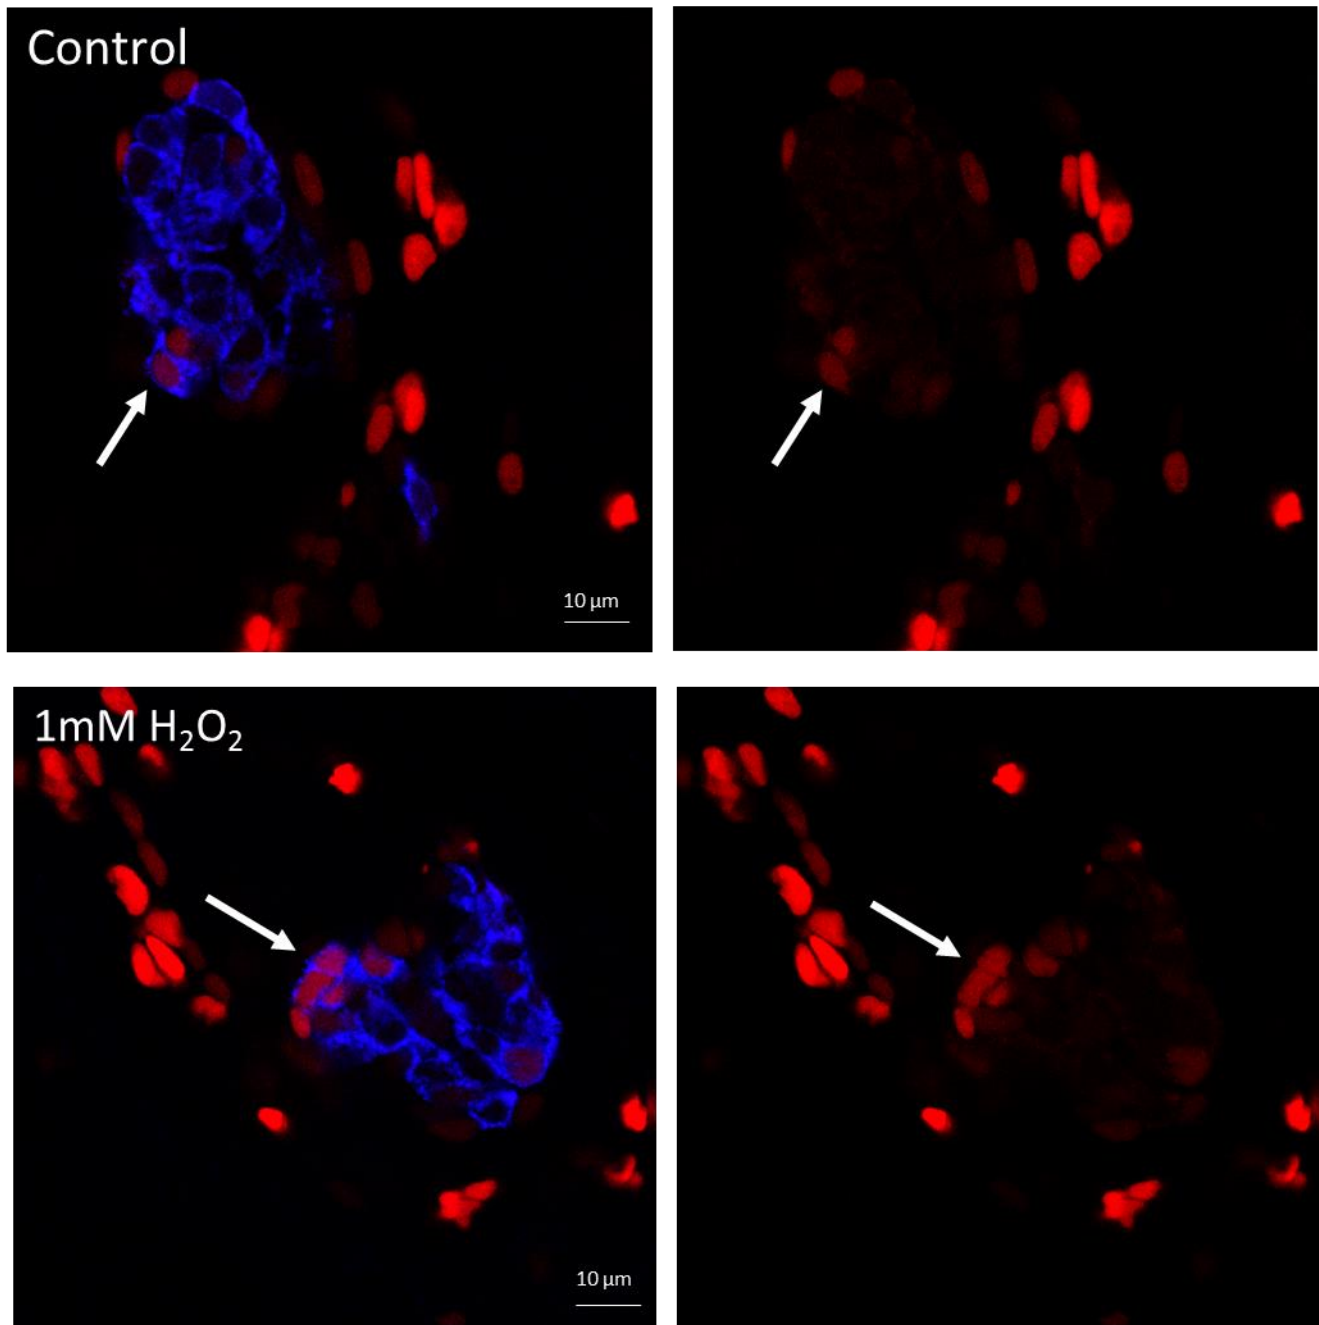

**Figure S6: Higher resolution images corresponding to the panels shown in Figure 5D.** Confocal sections of primary islets from *Tg(Tp1:H2BmCherry)* larvae stained for Insulin (blue). *Tg(Tp1:H2BmCherry)* drives expression of a fluorescent protein with long half-life (H2BmCherry) in the Notch responsive cells (NRCs) in the pancreas. Beta-cells that differentiate from NRCs can retain H2BmCherry-fluorescence due to perdurance. The larvae were treated with vehicle or 1 mM H<sub>2</sub>O<sub>2</sub> from 3 to 4 dpf. The arrows indicate *Tp1:H2BmCherry*<sup>+</sup> and insulin<sup>+</sup> cells in the periphery of the primary islets in controls and H<sub>2</sub>O<sub>2</sub>-treated larvae.

*Tg(Tp1:H2BmCherry); Tg(neurod1:GFP)*

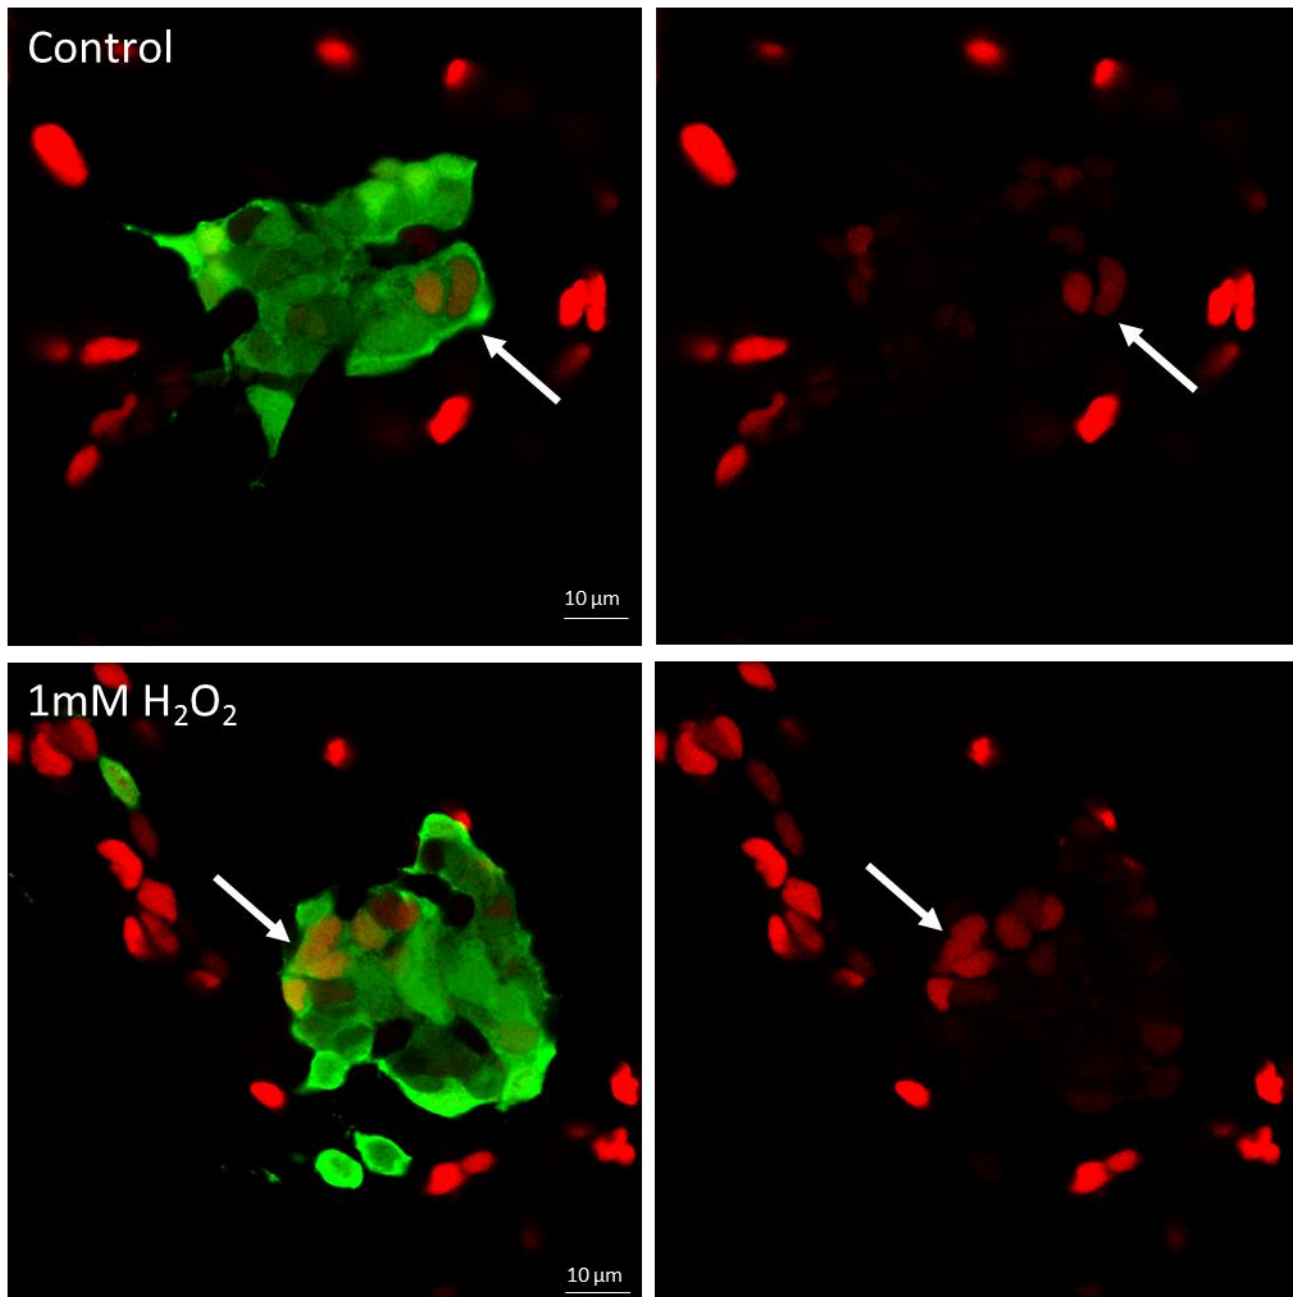

**Figure S7: Higher resolution images corresponding to the panels shown in Figure 5F.** Confocal sections of primary islets from *Tg(Tp1:H2BmCherry); Tg(neurod1-GFP)* larvae. The arrows indicate *Tp1:H2BmCherry*<sup>+</sup> and GFP<sup>+</sup> cells in the periphery of the primary islets in controls and H<sub>2</sub>O<sub>2</sub>-treated larvae.
